# Supplementary material for: Case Report: Molecular Characterization of Aggressive Malignant Retroperitoneal Solitary Fibrous Tumor: A Case Study
Source: Front Oncol. 2021 Dec 22;11:736969. doi: 10.3389/fonc.2021.736969 (PMC8727594; doi:10.3389/fonc.2021.736969)
Supplement: Supplementary file 1 [file Table_1.xlsx]

## Sheet: NAB2-STAT6 
	Table S1. List of primer sequences for RT-PCR
	Pair	Primer pair	Primer sequence	Fusion type	Size of PCR product
	1	NAB2 ex3 forward	5'-CCCGAGAGAGCACCTACTTG-3'	NAB2ex4-STAT6ex2	303bp
		STAT6 ex3 reverse	5'-GGTGCTGGACAGTGTCTGAA-3'	NAB2ex3*-STAT6ex2	234bp
	2	NAB2 ex4 forward	5'-GCTTCACCCTGAAGAACTGG-3'	NAB2ex4-STAT6ex4	202bp
		STAT6 ex5 reverse	5'-CCGCAAGCCTGTCTTAAACT-3'
	3	NAB2 ex6 forward-1	5'-ACATCCTGCAGCAGACACTG-3'	NAB2ex6-STAT6ex17	199bp
		STAT6 ex18 reverse-1	5'-TCTGGGGTAGGAAGTGGTTG-3'	NAB2ex6-intron-STAT6ex17	217bp
	4	NAB2 ex6 forward-2	5'-AGCAGACACTGATGGACGAG-3'	NAB2ex6-STAT6ex16	219bp
		STAT6 ex17 reverse	5'-TGGGCTTCTTGGGATAGAGA-3'	NAB2ex6-STAT6ex16*	162bp
				NAB2ex6-intron-STAT6ex16	258bp
	5	NAB2 ex5 forward-1	5'-GTCACCCTGAAATCCAGCAG-3'	NAB2ex6*-STAT6ex18*	344bp
		STAT6 ex18 reverse-2	5'-CATGCTCATGGAGGAATCAG-3'
	6	NAB2 ex7 forward	5'-TCTCGCAGAGTTCGAGGAAG-3'	NAB2ex6*-STAT6ex3*	135bp
		STAT6 ex2 reverse	5'-GAGACCAGACCCCACAGAGA-3'
	7	NAB2 ex5 forward-2	5'-GTCTGGGGAGAGTCTGGATG-3'	NAB2ex7*-STAT6ex2	133bp
		STAT6 ex3 reverse	5'-GGTGCTGGACAGTGTCTGAA-3'
	8	NAB2 ex2 forward	5'-CATCTATGGCCGTTTCGACT-3'	NAB2ex3-STAT6ex19	228bp
		STAT6 ex19 reverse	5'-GGGATGGAGTGAGAGTGTGG-3'
				* breakpoints within exons
