# Supplementary material for: Case Report: Molecular Characterization of Aggressive Malignant Retroperitoneal Solitary Fibrous Tumor: A Case Study
Source: Front Oncol. 2021 Dec 22;11:736969. doi: 10.3389/fonc.2021.736969 (PMC8727594; doi:10.3389/fonc.2021.736969)
Supplement: Supplementary file 6 [file Table_6.xlsx]

## Sheet: main
Gene_name	Primary differentiated tumor	Primary dedifferentiated tumor	Lung metastasis	Liver metastasis
ALK	1	1	1	1
ARID1B	1	1	1	1
ATR	1	1	1	1
AURKA	1	1	1	1
CARD11	1	1	1	1
CBLB	1	1	1	1
CREBBP	1	1	1	1
CUX1	1	1	1	1
EP300	1	1	1	1
ERBB3	1	1	1	1
FANCD2	1	1	1	1
FANCE	1	1	1	1
FBXW7	1	1	1	1
IDH1	1	1	1	1
JAK1	1	1	1	1
KAT6A	1	1	1	1
KDM5C	1	1	1	1
KMT2B	1	1	1	1
KMT2C	1	1	1	1
KMT2D	1	1	1	1
MTOR	1	1	1	1
NF1	1	1	1	1
NOTCH2	1	1	1	1
NTRK2	1	1	1	1
PDGFRB	1	1	1	1
POLE	1	1	1	1
RAD21	1	1	1	1
SETD2	1	1	1	1
SMARCA4	1	1	1	1
AR	1	1	1
BCL6	1	1	1
BCORL1	1	1	1
PAK3	1	1	1
SF3B1	1	1	1
U2AF1	1	1	1
BCOR	1	1		1
BRCA1	1	1		1
CCND1	1	1		1
CDK12	1	1		1
CSF1R	1	1		1
EPHA3	1	1		1
EZH2	1	1		1
FANCA	1	1		1
FGFR2	1	1		1
GEN1	1	1		1
GRIN2A	1	1		1
KDR	1	1		1
KMT2A	1	1		1
LRP1B	1	1		1
MAP2K4	1	1		1
MDM4	1	1		1
MET	1	1		1
MSH6	1	1		1
NSD1	1	1		1
NTRK3	1	1		1
PBRM1	1	1		1
PLCG1	1	1		1
POLD1	1	1		1
PTCH1	1	1		1
ROS1	1	1		1
SETBP1	1	1		1
SRSF2	1	1		1
APC	1		1	1
ARID2	1		1	1
BRAF	1		1	1
CIC	1		1	1
EGFR	1		1	1
EPAS1	1		1	1
FANCG	1		1	1
FLT4	1		1	1
PDGFRA	1		1	1
PPM1D	1		1	1
PRKDC	1		1	1
SOX9	1		1	1
TET2	1		1	1
STK11	1	1		1
SUFU	1	1		1
TSC2	1	1		1
ETV6		1	1	1
H3F3A		1	1	1
SRC		1	1	1
TP53		1	1	1
AKT2	1	1
ATM	1	1
FANCC	1	1
FUBP1	1	1
KDM6A	1	1
PMS1	1	1
SMO	1	1
SPOP	1	1
WT1	1	1
XRCC3	1	1
BCL2L1	1		1
CBLC	1		1
ERG	1		1
FGFR4	1		1
GNAQ	1		1
MRE11A	1		1
RB1	1		1
RNF43	1		1
XPO1	1		1
ARID1A	1			1
CSF3R	1			1
MPL	1			1
MUTYH	1			1
RIT1	1			1
DDR2	1			1
EXO1	1			1
MYCN	1			1
NFE2L2	1			1
ERBB4	1			1
CTNNB1	1			1
GATA2	1			1
FGFR3	1			1
WHSC1	1			1
DAXX	1			1
GALNT12	1			1
HRAS	1			1
FGF6	1			1
PTPN11	1			1
DICER1	1			1
HSP90AA1	1			1
AKT1	1			1
IGF1R	1			1
SUZ12	1			1
STAT3	1			1
AXIN2	1			1
RP11-120M18.2	1			1
DOT1L	1			1
DNM2	1			1
NOTCH3	1			1
JAK3	1			1
GNAS	1			1
BCR	1			1
MED12	1			1
ABL1		1		1
BRIP1		1		1
CDH1		1		1
CDK6		1		1
CDKN2A		1		1
CTNNA1		1		1
MLH1		1		1
NOTCH1		1		1
NOTCH2NL		1		1
PALB2		1		1
RAD50		1		1
SMC1A		1		1
AURKC		1	1
FLT3		1	1
HNF1A		1	1
IDH2		1	1
MYD88		1	1
BRCA2			1	1
CYLD			1	1
ERBB2			1	1
AMER1	1
ASXL1	1
AXIN1	1
B2M	1
BAP1	1
BLM	1
CBL	1
CCND3	1
CRLF2	1
DNMT3A	1
FAM46C	1
FGFR1	1
FLCN	1
GATA3	1
HGF	1
IKZF1	1
IKZF3	1
JAK2	1
MAP2K1	1
MAP3K1	1
MCL1	1
NKX2-1	1
PIK3R2	1
PMS2	1
PRKAR1A	1
PTEN	1
RET	1
RHEB	1
TCF3	1
TRAF3	1
TSPAN31	1
XRCC2	1
ZNF276	1
ATRX		1
CD79A		1
EPHA5		1
MEF2B		1
MSH2		1
RP11-211G3.3		1
SMAD2		1
SMC3		1
STAG2		1
BCL2				1
CD79B				1
GATA1				1
GNA11				1
GREM1				1
HOXB13				1
INHBA				1
NF2				1
PPP2R1A				1
RHOA				1
TGFBR2				1
TNFAIP3				1
TSHR				1
ZNF217				1
